# Supplementary material
Source: PubMed Central journal article supplement (PMC9157509)
Supplement: NIHMS1808179-supplement-Supplementary_Materials.pdf [file NIHMS1808179-supplement-Supplementary_Materials.pdf]

# Overcoming Universal Restrictions on Metal Selectivity By Protein Design

Tae Su Choi and F. Akif Tezcan

Department of Chemistry and Biochemistry, University of California, San Diego, La Jolla, CA,  
92093-0340, USA

|                              | <b>Page</b> |
|------------------------------|-------------|
| <b>Supplementary Method</b>  | 2           |
| <b>Supplementary Figures</b> |             |
| Figure 1                     | 4           |
| Figure 2                     | 5           |
| <b>Supplementary Tables</b>  |             |
| Table 1                      | 6           |
| Table 2                      | 7           |
| Table 3                      | 8           |
| Table 4                      | 9           |
| Table 5                      | 10          |

## Supplementary Method

### Mathematical calculation of metal-free and metal-bound (AB)<sub>2</sub> in competitive conditions

with Cu<sup>II</sup>. Fractions of metal-free and metal-bound (AB)<sub>2</sub> species were calculated using  $K_d$  values of 1Cu<sup>II</sup>-(AB)<sub>2</sub>, 2Ni<sup>II</sup>-(AB)<sub>2</sub>, and 2Co<sup>II</sup>-(AB)<sub>2</sub> as a function of metal concentration. All mathematical models of the (AB)<sub>2</sub> fractions were derived from equations for equilibrium dissociation constants. Fractions of individual (AB)<sub>2</sub> species are represented as

$$F_{2M^{II}} = \frac{[2M^{II}-(AB)_2]}{[(AB)_2]_{tot}}, F_{M^{II}} = \frac{[M^{II}-(AB)_2]}{[(AB)_2]_{tot}}, F_{Cu^{II}} = \frac{[Cu^{II}-(AB)_2]}{[(AB)_2]_{tot}} \quad (1)$$

where  $[(AB)_2]_{tot}$  indicates the total amount of metal-free and metal-bound (AB)<sub>2</sub> species and M<sup>II</sup> indicates Co<sup>II</sup> or Ni<sup>II</sup>. Using the definition of  $K_d$ ,  $[(AB)_2]_{tot}$  can be expressed as follows:

$$[(AB)_2]_{tot} = [(AB)_2] + [Cu^{II}-(AB)_2] + [M^{II}-(AB)_2] + [2M^{II}-(AB)_2] \quad (2)$$

$$= [(AB)_2] + \frac{[(AB)_2][Cu^{II}]}{K_{d,Cu^{II}}} + \frac{[(AB)_2][M^{II}]}{K_{d1,M^{II}}} + \frac{[(AB)_2][M^{II}]^2}{K_{d1,M^{II}}K_{d2,M^{II}}} \quad (3)$$

$$[2M^{II}-(AB)_2] = \frac{[(AB)_2][M^{II}]^2}{K_{d1,M^{II}}K_{d2,M^{II}}} \quad (4)$$

Incorporating (3) and (4) into (1) yields:

$$\therefore F_{2M^{II}} = \frac{[2M^{II}-(AB)_2]}{[(AB)_2]_{tot}} = \frac{\frac{[M^{II}]^2}{K_{d1,M^{II}}K_{d2,M^{II}}}}{1 + \frac{[Cu^{II}]}{K_{d,Cu^{II}}} + \frac{[M^{II}]}{K_{d1,M^{II}}} + \frac{[M^{II}]^2}{K_{d1,M^{II}}K_{d2,M^{II}}}} \quad (5)$$

Fractions of  $[(AB)_2]$ ,  $[M^{II}-(AB)_2]$ , and  $[Cu^{II}-(AB)_2]$  are derived in the same manner.

$$[M^{II}-(AB)_2] = \frac{[(AB)_2][M^{II}]}{K_{d1,M^{II}}} \quad (6)$$

$$\therefore F_{M^{II}} = \frac{[M^{II}-(AB)_2]}{[(AB)_2]_{tot}} = \frac{\frac{[M^{II}]}{K_{d1,M^{II}}}}{1 + \frac{[Cu^{II}]}{K_{d,Cu^{II}}} + \frac{[M^{II}]}{K_{d1,M^{II}}} + \frac{[M^{II}]^2}{K_{d1,M^{II}}K_{d2,M^{II}}}} \quad (7)$$

$$[Cu^{II}-(AB)_2] = \frac{[(AB)_2][Cu^{II}]}{K_{d,Cu^{II}}} \quad (8)$$

$$\therefore F_{Cu^{II}} = \frac{[Cu^{II}-(AB)_2]}{[(AB)_2]_{tot}} = \frac{\frac{[Cu^{II}]}{K_{d,Cu^{II}}}}{1 + \frac{[Cu^{II}]}{K_{d,Cu^{II}}} + \frac{[M^{II}]}{K_{d1,M^{II}}} + \frac{[M^{II}]^2}{K_{d1,M^{II}}K_{d2,M^{II}}}} \quad (8)$$

$$\therefore F_{(AB)_2} = 1 - F_{2M^{II}} - F_{M^{II}} - F_{Cu^{II}} = \frac{1}{1 + \frac{[Cu^{II}]}{K_{d,Cu^{II}}} + \frac{[M^{II}]}{K_{d1,M^{II}}} + \frac{[M^{II}]^2}{K_{d1,M^{II}}K_{d2,M^{II}}}} \quad (9)$$

$M^{II}$  is the concentration of  $Co^{II}$  or  $Ni^{II}$ . The concentrations of  $M^{II}$  and  $Cu^{II}$  were considered as buffered species to calculate the fractions of metal-free and metal-bound  $(AB)_2$  species. Since the fractions of  $[M^{II}-(AB)_2]$  were negligible in actual calculations using  $K_d$  values, they were not included in Fig. 2a. Additionally, because there was no experimental evidence for the formation of heterometallic species (e.g.  $Cu^{II}+M^{II}-(AB)_2$ ) in ESI-MS (Extended Data Fig. 3d), the fractions of the heterometallic  $(AB)_2$  complexes were excluded in the equilibrium.

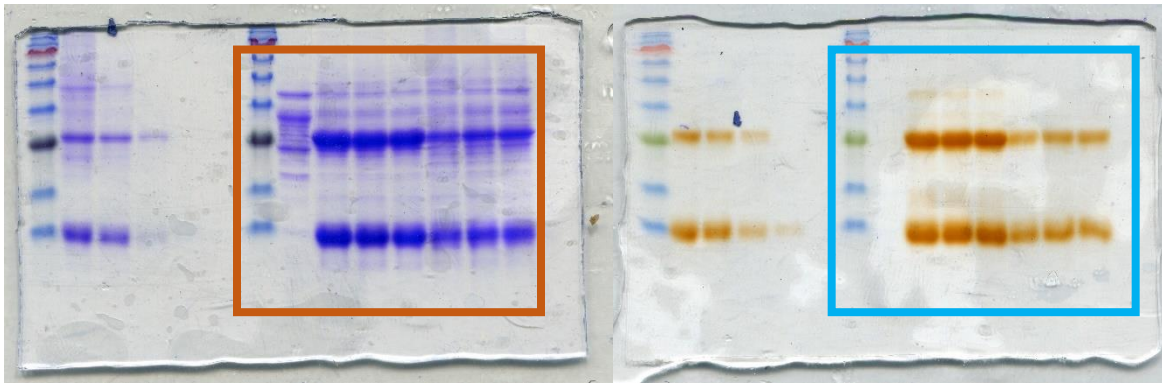

**Supplementary Figure 1** | Uncropped gel images of Figures 4b (brown) and 4c (cyan).

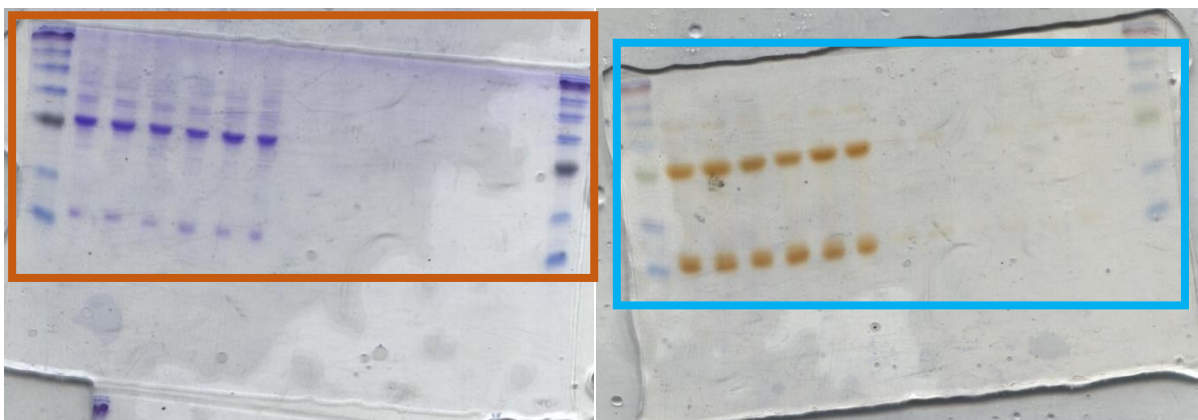

**Supplementary Figure 2** | Uncropped gel images of Extended Data Figures 7a (brown) and 7b (cyan).

**Supplementary Table 1** | Crystallization conditions for reported PDB structures.

| Structure <sup>a</sup>                                 | Metal                                 |           | Beamline          | Precipitant                                                |
|--------------------------------------------------------|---------------------------------------|-----------|-------------------|------------------------------------------------------------|
| 2Co <sup>II</sup> -(AB) <sub>2</sub>                   | CoCl <sub>2</sub>                     | 4 mM      | UCSD <sup>b</sup> | PEG1500 25%, NaCl 140 mM, pH 6.6 MES 100 mM                |
| 2Ni <sup>II</sup> -(AB) <sub>2</sub>                   | NiCl <sub>2</sub>                     | 4 mM      | ALS 5.0.2.        | PEG1500 25%, pH 8 EPPS 100 mM                              |
| 1Cu <sup>II</sup> -(AB) <sub>2</sub>                   | CuCl <sub>2</sub>                     | 4 mM      | UCSD <sup>b</sup> | PEG1500 25%, CaCl <sub>2</sub> 200 mM, pH 6 MES 100 mM     |
| Co <sup>II</sup> //Cu <sup>II</sup> -(AB) <sub>2</sub> | CoCl <sub>2</sub> //CuCl <sub>2</sub> | 4 mM//4mM | SSRL 9-2          | PEG1500 25%, NH <sub>4</sub> Ac 160 mM, pH 8.4 EPPS 100 mM |
| Cu <sup>II</sup> //Co <sup>II</sup> -(AB) <sub>2</sub> | CuCl <sub>2</sub> //CoCl <sub>2</sub> | 4 mM//4mM | SSRL 9-2          | PEG1500 25%, NaCl 200 mM, pH 8 EPPS 100 mM                 |
| Ni <sup>II</sup> //Cu <sup>II</sup> -(AB) <sub>2</sub> | NiCl <sub>2</sub> //CuCl <sub>2</sub> | 4 mM//4mM | SSRL 9-2          | PEG1500 22%, NH <sub>4</sub> Ac 160 mM, pH 8 EPPS 100 mM   |
| Cu <sup>II</sup> //Ni <sup>II</sup> -(AB) <sub>2</sub> | CuCl <sub>2</sub> //NiCl <sub>2</sub> | 4 mM//4mM | SSRL 9-2          | PEG1500 25%, NH <sub>4</sub> Ac 200 mM, pH 8.4 EPPS 100 mM |
| 1Co <sup>II</sup> -H100A(AB) <sub>2</sub>              | CoCl <sub>2</sub>                     | 4 mM      | SSRL 9-2          | PEG1500 25%, MgCl <sub>2</sub> 200 mM, EPPS 100 mM, pH 8   |
| 1Ni <sup>II</sup> -H100A(AB) <sub>2</sub>              | NiCl <sub>2</sub>                     | 4 mM      | SSRL 9-2          | PEG1500 25%, MgCl <sub>2</sub> 200 mM, MOPS 100 mM, pH 7   |

<sup>a</sup>Dimer concentration was 2 mM. <sup>b</sup>Diffraction data was collected on a Bruker APEX II CCD detector equipped with Cu K<sub>α</sub> source in UCSD X-ray crystallography facility.

**Supplementary Table 2** | Theoretical and observed  $m/z$  values of  $(AB)_2$  complexes observed in non-competitive conditions.

| <b>Species</b>    | <b>Theoretical <math>m/z</math></b> | <b>Observed <math>m/z</math></b> |
|-------------------|-------------------------------------|----------------------------------|
| $(AB)_2$          | 2275.09                             | 2275.09                          |
| $1Co^{II}-(AB)_2$ | 2280.27                             | 2280.27                          |
| $2Co^{II}-(AB)_2$ | 2285.45                             | 2285.45                          |
| $1Ni^{II}-(AB)_2$ | 2280.25                             | 2280.27                          |
| $2Ni^{II}-(AB)_2$ | 2285.40                             | 2285.40                          |
| $1Cu^{II}-(AB)_2$ | 2280.70                             | 2280.63                          |
| $2Cu^{II}-(AB)_2$ | 2286.29                             | 2286.26                          |

**Supplementary Table 3** | Experimental  $m/z$  values of  $(AB)_2$  complexes observed in the competitive conditions with  $Cu^{II}$ .

| Species            | $m/z$ ( $Co^{II}/Cu^{II}$ ) | $m/z$ ( $Cu^{II}/Co^{II}$ ) | $m/z$ ( $Ni^{II}/Cu^{II}$ ) | $m/z$ ( $Cu^{II}/Ni^{II}$ ) |
|--------------------|-----------------------------|-----------------------------|-----------------------------|-----------------------------|
| $1M^{II}-(AB)_2$   | 2280.50                     | 2280.45                     | -                           | -                           |
| $2M^{II}-(AB)_2$   | 2285.54                     | 2285.54                     | 2285.45                     | 2285.45                     |
| $3M^{II}-(AB)_2^a$ | -                           | -                           | 2290.98                     | 2290.98                     |

<sup>a</sup> $2Ni^{II}+1Cu^{II}-(AB)_2$  (Theo  $m/z$  2290.99)



**Supplementary Table 4** | Theoretical and experimental  $m/z$  values of  $\text{H}^{100\text{A}}(\text{AB})_2$  complexes observed in non-competitive conditions.

| Species                                                      | Theoretical $m/z$ | Observed $m/z$ |
|--------------------------------------------------------------|-------------------|----------------|
| $\text{H}^{100\text{A}}(\text{AB})_2$                        | 2263.05           | 2263.05        |
| $1\text{Co}^{\text{II}}\text{-H}^{100\text{A}}(\text{AB})_2$ | 2268.22           | 2268.22        |
| $1\text{Ni}^{\text{II}}\text{-H}^{100\text{A}}(\text{AB})_2$ | 2268.19           | 2268.22        |
| $1\text{Cu}^{\text{II}}\text{-H}^{100\text{A}}(\text{AB})_2$ | 2268.64           | 2268.63        |
| $2\text{Cu}^{\text{II}}\text{-H}^{100\text{A}}(\text{AB})_2$ | 2274.24           | 2274.25        |
| $3\text{Cu}^{\text{II}}\text{-H}^{100\text{A}}(\text{AB})_2$ | 2279.83           | 2279.88        |

**Supplementary Table 5** | Experimental  $m/z$  values of  ${}^{\text{H100A}}(\text{AB})_2$  complexes observed in the competitive conditions with  $\text{Cu}^{\text{II}}$ .

| Species                                                                  | $m/z$ ( $\text{Co}^{\text{II}}/\text{Cu}^{\text{II}}$ ) | $m/z$ ( $\text{Cu}^{\text{II}}/\text{Co}^{\text{II}}$ ) | $m/z$ ( $\text{Ni}^{\text{II}}/\text{Cu}^{\text{II}}$ ) | $m/z$ ( $\text{Cu}^{\text{II}}/\text{Ni}^{\text{II}}$ ) |
|--------------------------------------------------------------------------|---------------------------------------------------------|---------------------------------------------------------|---------------------------------------------------------|---------------------------------------------------------|
| $1\text{M}^{\text{II}}\text{-}{}^{\text{H100A}}(\text{AB})_2$            | 2268.58                                                 | 2268.58                                                 | 2268.37                                                 | 2268.37                                                 |
| $2\text{M}^{\text{II}}\text{-}{}^{\text{H100A}}(\text{AB})_2$            | 2274.02                                                 | 2274.22                                                 | 2273.90                                                 | 2273.90                                                 |
| $3\text{M}^{\text{II}}\text{-}{}^{\text{H100A}}(\text{AB})_2^{\text{a}}$ | 2279.60                                                 | 2279.60                                                 | 2279.44                                                 | 2279.44                                                 |
